# Supplementary material for: Mouse genome-wide association studies and systems genetics uncover the genetic architecture associated with hepatic pharmacokinetic and pharmacodynamic properties of a constrained ethyl antisense oligonucleotide targeting Malat1
Source: PubMed Central journal article supplement (PMC6224167; doi:10.1371/journal.pgen.1007732), 2018-10-29
Supplement: pgen.1007732.s011.pdf [file pgen.1007732.s011.pdf]

**S1 Table****ASO Uptake *cis*-eQTL Chromosome 4 rs32062485**

| <b>Symbol</b> | <b>Gene Chr.</b> | <b>Gene Name</b>                                          | <b>rsID</b> | <b>p value</b> | <b>Localization</b> |
|---------------|------------------|-----------------------------------------------------------|-------------|----------------|---------------------|
| Fam213b       | 4                | family with sequence similarity 213, member B             | rs31759536  | 3.62819E-39    | Hepatic             |
| Vamp3         | 4                | vesicle-associated membrane protein 3                     | rs32925574  | 2.40505E-28    | Hepatic             |
| Ubiad1        | 4                | UbiA prenyltransferase domain containing 1                | rs32144125  | 3.58353E-19    | Hepatic             |
| Fv1           | 4                | Friend virus susceptibility 1                             | rs32925574  | 3.1979E-16     |                     |
| Faap20        | 4                | Fanconi anemia core complex associated protein 20         | rs32175718  | 4.7706E-15     | Hepatic             |
| Gnb1          | 4                | guanine nucleotide binding protein (G protein), beta 1    | rs33102923  | 9.73864E-14    | Hepatic             |
| Mtor          | 4                | mechanistic target of rapamycin (serine/threonine kinase) | rs32925574  | 3.28275E-12    | Hepatic             |
| Tnfrsf14      | 4                | tumor necrosis factor receptor superfamily, member 14     | rs33115581  | 9.83177E-11    | Hepatic             |
| Arhgef16      | 4                | Rho guanine nucleotide exchange factor (GEF) 16           | rs32671719  | 2.91791E-09    | Hepatic             |
| Tnfrsf1b      | 4                | tumor necrosis factor receptor superfamily, member 1b     | rs33111151  | 4.27209E-09    | Hepatic             |
| Exosc10       | 4                | exosome component 10                                      | rs33115456  | 3.66325E-08    | Hepatic             |
| Cep85         | 4                | centrosomal protein 85                                    | rs32773709  | 2.31819E-07    | Hepatic             |
| Spsb1         | 4                | splA/ryanodine receptor domain and SOCS box containing 1  | rs32455481  | 3.2189E-07     | Non-Hepatic         |
| Dffa          | 4                | DNA fragmentation factor, alpha subunit                   | rs32455481  | 5.49642E-07    | Hepatic             |
| Tmem51        | 4                | transmembrane protein 51                                  | rs32925574  | 1.15705E-06    | Hepatic             |
| Pqlc2         | 4                | PQ loop repeat containing 2                               | rs32925574  | 1.30411E-06    | Hepatic             |
| Foxj3         | 4                | forkhead box J3                                           | rs33081679  | 1.34699E-06    | Hepatic             |
| Hint2         | 4                | histidine triad nucleotide binding protein 2              | rs33112359  | 1.65591E-06    | Hepatic             |

**ASO Uptake *trans*-eQTL Chromosome 4 rs32062485**

| <b>Symbol</b> | <b>Gene Chr.</b> | <b>Gene Name</b>                                     | <b>rsID</b> | <b>p value</b> | <b>Localization</b> |
|---------------|------------------|------------------------------------------------------|-------------|----------------|---------------------|
| Dvl1          | 4                | dishevelled segment polarity protein 1               | rs32185148  | 2.60159E-34    | Hepatic             |
| Gltpd1        | 4                | ceramide-1-phosphate transfer protein                | rs32185148  | 7.05317E-34    | Hepatic             |
| Cpsf3l        | 4                | integrator complex subunit 11                        | rs32185148  | 4.19846E-21    | Hepatic             |
| Akr1e1        | 13               | aldo-keto reductase family 1                         | rs33109769  | 1.26642E-15    | Hepatic             |
| Ccnl2         | 4                | cyclin L2                                            | rs32185148  | 1.86876E-15    | Hepatic             |
| Mrpl20        | 4                | mitochondrial ribosomal protein L20                  | rs33102923  | 1.11055E-14    | Hepatic             |
| Agri          | 4                | agrin                                                | rs32185148  | 1.37293E-12    | Hepatic             |
| Akr1c12       | 13               | aldo-keto reductase family 1, member C12             | rs33055189  | 1.46088E-11    | Hepatic             |
| Mxra8         | 4                | matrix-remodelling associated 8                      | rs31856521  | 6.29551E-11    | Hepatic             |
| Cox6b2        | 7                | cytochrome c oxidase subunit VIb polypeptide 2       | rs32987700  | 2.51768E-10    | Non-Hepatic         |
| Aurkaip1      | 4                | aurora kinase A interacting protein 1                | rs32867390  | 4.03152E-10    | Hepatic             |
| 9430015G10Rik | 4                | RIKEN cDNA 9430015G10 gene                           | rs32185148  | 6.68757E-10    | Hepatic             |
| 1700020D05Rik | 19               | RIKEN cDNA 1700020D05                                | rs33098446  | 1.05749E-09    |                     |
| Drap1         | 19               | Dr1 associated protein 1 (negative cofactor 2 alpha) | rs32925574  | 1.3795E-09     | Hepatic             |
| Rap1gap       | 4                | Rap1 GTPase-activating protein                       | rs33114367  | 1.80966E-09    | Hepatic             |
| Ece1          | 4                | endothelin converting enzyme 1                       | rs33110013  | 4.94019E-09    | Hepatic             |
| Stk3          | 15               | serine/threonine kinase 3                            | rs6364274   | 5.02105E-09    | Hepatic             |
| Eif4g3        | 4                | eukaryotic translation initiation factor 4 gamma, 3  | rs32747066  | 1.07142E-08    | Hepatic             |
| Gata6         | 18               | GATA binding protein 6                               | rs33097780  | 2.72367E-08    | Hepatic             |
| Akr1c18       | 13               | aldo-keto reductase family 1, member C18             | rs33055189  | 2.83593E-08    | Non-Hepatic         |
| Fam174b       | 7                | family with sequence similarity 174, member B        | rs33113373  | 4.10096E-08    | Hepatic             |
| Dnajc24       | 2                | DnaJ heat shock protein family (Hsp40) member C24    | rs33064476  | 6.58198E-08    | Hepatic             |
| Mul1          | 4                | mitochondrial ubiquitin ligase activator of NFKB 1   | rs33110013  | 1.37181E-07    | Hepatic             |
| Fam63a        | 3                | MINDY lysine 48 deubiquitinase 1                     | rs33111379  | 1.45179E-07    | Hepatic             |

|               |    |                                                                 |            |             |             |
|---------------|----|-----------------------------------------------------------------|------------|-------------|-------------|
| Fam114a2      | 11 | family with sequence similarity 114, member A2                  | rs31759536 | 1.73688E-07 | Hepatic     |
| Stard8        | X  | START domain containing 8                                       | rs33111151 | 2.25269E-07 | Hepatic     |
| Col5a1        | 2  | collagen, type V, alpha 1                                       | rs33076268 | 2.62128E-07 | Non-Hepatic |
| C1qtnf4       | 2  | C1q and tumor necrosis factor related protein 4                 | rs33076170 | 2.76805E-07 | Non-Hepatic |
| Dnajc28       | 16 | DnaJ heat shock protein family (Hsp40) member C28               | rs33060473 | 4.13988E-07 | Hepatic     |
| Rccd1         | 7  | RCC1 domain containing 1                                        | rs33070315 | 5.48501E-07 | Hepatic     |
| Ctns          | 11 | cystinosis, nephropathic                                        | rs33109769 | 5.89707E-07 | Hepatic     |
| Elf3          | 1  | E74-like factor 3                                               | rs33113368 | 5.97127E-07 | Non-Hepatic |
| Irf7          | 7  | interferon regulatory factor 7                                  | rs32925574 | 7.36665E-07 | Hepatic     |
| 1600012H06Rik | 17 | RIKEN cDNA 1600012H06 gene                                      | rs33111379 | 7.74073E-07 | Hepatic     |
| Fxr1          | 3  | fragile X mental retardation gene 1, autosomal homolog          | rs32240565 | 8.82635E-07 | Hepatic     |
| Ptger3        | 3  | prostaglandin E receptor 3 (subtype EP3)                        | rs33003752 | 9.87243E-07 | Non-Hepatic |
| Ap3m2         | 8  | adaptor-related protein complex 3, mu 2 subunit                 | rs33113373 | 1.36977E-06 | Non-Hepatic |
| Hbegf         | 18 | heparin-binding EGF-like growth factor                          | rs33109769 | 1.3746E-06  | Non-Hepatic |
| Atg5          | 10 | autophagy related 5                                             | rs33098446 | 1.40621E-06 | Hepatic     |
| Skp1a         | 11 | S-phase kinase-associated protein 1A                            | rs32925574 | 1.4756E-06  | Hepatic     |
| Hspa1a        | 17 | heat shock protein 1A                                           | rs33100483 | 1.81975E-06 |             |
| Havcr1        | 11 | hepatitis A virus cellular receptor 1                           | rs32952372 | 2.00947E-06 | Hepatic     |
| Sh3gl1        | 17 | SH3-domain GRB2-like 1                                          | rs33103096 | 2.05701E-06 | Hepatic     |
| Itpr2         | 6  | inositol 1,4,5-triphosphate receptor 2                          | rs33111379 | 2.12799E-06 | Hepatic     |
| Slc35a2       | X  | solute carrier family 35 (UDP-galactose transporter), member A2 | rs33103096 | 2.55659E-06 | Hepatic     |
| Snap29        | 16 | inositol 1,4,5-triphosphate receptor 2                          | rs33077064 | 2.9029E-06  | Hepatic     |
| Cmip          | 8  | c-Maf inducing protein                                          | rs33111379 | 3.00171E-06 | Hepatic     |
| Atad3a        | 4  | ATPase family, AAA domain containing 3A                         | rs32185148 | 3.32767E-06 | Hepatic     |
| Rpgrip1       | 14 | retinitis pigmentosa GTPase regulator interacting protein 1     | rs33077064 | 3.53459E-06 | Hepatic     |
| Slc46a1       | 11 | solute carrier family 46, member 1                              | rs33106342 | 3.73866E-06 | Hepatic     |

|       |    |             |            |             |         |
|-------|----|-------------|------------|-------------|---------|
| Pbrm1 | 14 | polybromo 1 | rs33070315 | 3.96851E-06 | Hepatic |
|-------|----|-------------|------------|-------------|---------|
