# Supplementary material for: Mouse genome-wide association studies and systems genetics uncover the genetic architecture associated with hepatic pharmacokinetic and pharmacodynamic properties of a constrained ethyl antisense oligonucleotide targeting Malat1
Source: PubMed Central journal article supplement (PMC6224167; doi:10.1371/journal.pgen.1007732), 2018-10-29
Supplement: pgen.1007732.s012.pdf [file pgen.1007732.s012.pdf]

**S2 Table****ASO Uptake *cis*-eQTL rs29364476 Chromosome 10**

| <b>Symbol</b> | <b>Gene Chr.</b> | <b>Gene Name</b>                                                       | <b>rsID</b> | <b>p value</b> | <b>Localization</b> |
|---------------|------------------|------------------------------------------------------------------------|-------------|----------------|---------------------|
| Nedd1         | 10               | neural precursor cell expressed, developmentally down-regulated gene 1 | rs6222436   | 6.87707E-18    | Hepatic             |
| Ndufa12       | 10               | NADH dehydrogenase (ubiquinone) 1 alpha subcomplex, 12                 | rs50617055  | 3.09593E-15    | Hepatic             |
| Nfyb          | 10               | nuclear transcription factor-Y beta                                    | rs29349626  | 6.43459E-11    | Non-Hepatic         |
| Amdhd1        | 10               | amidohydrolase domain containing 1                                     | rs36924269  | 2.849E-09      | Hepatic             |
| Uhrf1bp1l     | 10               | UHRF1 (ICBP90) binding protein 1-like                                  | rs29353578  | 1.22142E-08    | Hepatic             |
| Nt5dc3        | 10               | 5'-nucleotidase domain containing 3                                    | rs29320622  | 1.50441E-08    | Hepatic             |
| Fig4          | 10               | FIG4 phosphoinositide 5-phosphatase                                    | rs51355169  | 3.637E-07      | Non-Hepatic         |
| Pah           | 10               | phenylalanine hydroxylase                                              | rs29348009  | 1.54626E-06    | Hepatic             |
| Stab2         | 10               | stabilin 2                                                             | rs30243927  | 3.48204E-06    | Hepatic             |

**ASO Uptake *trans*-eQTL rs29364476 Chromosome 10**

| <b>Symbol</b> | <b>Gene Chr.</b> | <b>Gene Name</b>                                               | <b>rsID</b> | <b>p value</b> | <b>Localization</b> |
|---------------|------------------|----------------------------------------------------------------|-------------|----------------|---------------------|
| Hbegf         | 18               | heparin-binding EGF-like growth factor                         | rs51355169  | 1.90735E-16    | Non-Hepatic         |
| Lta4h         | 10               | leukotriene A4 hydrolase                                       | rs50847752  | 1.72835E-12    | Hepatic             |
| Actr6         | 10               | ARP6 actin-related protein 6                                   | rs29341703  | 3.16256E-12    | Hepatic             |
| Sepw1         | 7                | selenoprotein W                                                | rs30242163  | 3.38427E-12    | Hepatic             |
| Mmp12         | 9                | matrix metalloproteinase 12                                    | rs51355169  | 8.68859E-10    | Non-Hepatic         |
| Casp9         | 4                | caspase 9                                                      | rs51355169  | 4.98257E-09    | Hepatic             |
| Fmod          | 1                | fibromodulin                                                   | rs51355169  | 1.23495E-08    | Hepatic             |
| Fmn1          | 2                | formin 1                                                       | rs51355169  | 3.41644E-08    | Hepatic             |
| Clcn7         | 17               | chloride channel, voltage-sensitive 7                          | rs51355169  | 6.16013E-08    | Hepatic             |
| Vamp3         | 4                | vesicle-associated membrane protein 3                          | rs29315879  | 6.32066E-08    | Hepatic             |
| Clcn3         | 8                | chloride channel, voltage-sensitive 3                          | rs30242163  | 7.32935E-08    | Hepatic             |
| Vps4b         | 1                | vacuolar protein sorting 4B                                    | rs30246486  | 9.35167E-08    | Hepatic             |
| Ackr2         | 9                | atypical chemokine receptor 2                                  | rs51355169  | 9.63891E-08    | Hepatic             |
| Pja1          | X                | praja ring finger ubiquitin ligase 1                           | rs30241858  | 1.14002E-07    | Hepatic             |
| Kcne3         | 7                | potassium voltage-gated channel, Isk-related subfamily, gene 3 | rs29371234  | 2.00084E-07    | Non-Hepatic         |
| D19Bwg1357e   | 19               | pumilio RNA-binding family member 3                            | rs50412470  | 4.59607E-07    | Hepatic             |
| Psme4         | 11               | proteasome (prosome, macropain) activator subunit 4            | rs51355169  | 4.67172E-07    | Hepatic             |
| Tulp1         | 17               | tubby like protein 1                                           | rs51355169  | 5.29485E-07    | Non-Hepatic         |
| Rgs10         | 7                | regulator of G-protein signalling 10                           | rs51355169  | 6.13397E-07    | Hepatic             |
| Akr1e1        | 13               | aldo-keto reductase family 1, member E1                        | rs13480690  | 7.30781E-07    | Hepatic             |
| Dqx1          | 6                | DEAQ RNA-dependent ATPase                                      | rs30241858  | 8.24512E-07    | Hepatic             |
| Fbxw11        | 11               | F-box and WD-40 domain protein 11                              | rs51355169  | 8.94646E-07    | Hepatic             |
| Uba2          | 7                | ubiquitin-like modifier activating enzyme 2                    | rs51355169  | 1.14828E-06    | Hepatic             |
| H1fx          | 6                | H1 histone family, member X                                    | rs51355169  | 1.21804E-06    | Hepatic             |

|        |    |                                                          |            |             |             |
|--------|----|----------------------------------------------------------|------------|-------------|-------------|
| Nol7   | 13 | nucleolar protein 7                                      | rs51355169 | 1.2357E-06  | Hepatic     |
| Alox12 | 11 | arachidonate 12-lipoxygenase                             | rs51355169 | 1.25733E-06 | Hepatic     |
| Mrpl35 | 6  | mitochondrial ribosomal protein L35                      | rs51355169 | 1.53695E-06 | Hepatic     |
| Vps29  | 5  | VPS29 retromer complex component                         | rs51355169 | 2.19758E-06 | Hepatic     |
| Pign   | 1  | phosphatidylinositol glycan anchor biosynthesis, class N | rs13480690 | 2.28145E-06 | Hepatic     |
| Armt1  | 10 | acidic residue methyltransferase 1                       | rs29335877 | 2.61239E-06 | Hepatic     |
| Hipk3  | 2  | homeodomain interacting protein kinase 3                 | rs52052267 | 2.63859E-06 | Hepatic     |
| Pdha1  | X  | pyruvate dehydrogenase E1 alpha 1                        | rs45715710 | 3.30902E-06 | Hepatic     |
| Ubr5   | 15 | ubiquitin protein ligase E3 component n-recognin 5       | rs13480690 | 3.32605E-06 | Hepatic     |
| Cdca4  | 12 | cell division cycle associated 4                         | rs29379178 | 3.42941E-06 | Hepatic     |
| Cnn1   | 9  | calponin 1                                               | rs51355169 | 3.79509E-06 | Non-Hepatic |
| Irak1  | X  | interleukin-1 receptor-associated kinase 1               | rs51355169 | 3.87193E-06 | Hepatic     |
