# Supplementary material for: Mouse genome-wide association studies and systems genetics uncover the genetic architecture associated with hepatic pharmacokinetic and pharmacodynamic properties of a constrained ethyl antisense oligonucleotide targeting Malat1
Source: PubMed Central journal article supplement (PMC6224167; doi:10.1371/journal.pgen.1007732), 2018-10-29
Supplement: pgen.1007732.s013.pdf [file pgen.1007732.s013.pdf]

**S3 Table****ASO Activity *cis*-eQTL Chromosome 4 rs27549337**

| Symbol | Gene Chr. | Gene Name                                       | rsID       | p value  | Localization |
|--------|-----------|-------------------------------------------------|------------|----------|--------------|
| Ncdn   | 4         | Neurochondrin                                   | rs27549413 | 2.03E-08 | Non-Hepatic  |
| Tceb3  | 4         | Transcription elongation factor B polypeptide 3 | rs27549413 | 4.23E-08 | Hepatic      |
| Utp11l | 4         | Small Subunit Processome Component              | rs32899752 | 1.02E-07 | Hepatic      |
| Hdac1  | 4         | Histone Deacetylase 1                           | rs27549240 | 4.39E-07 | Hepatic      |

**ASO Activity *trans*-eQTL Chromosome 4 rs27549337**

| Symbol  | Gene Chr. | Gene Name                                          | rsID       | p value     | Localization |
|---------|-----------|----------------------------------------------------|------------|-------------|--------------|
| Cap1    | 4         | CAP, adenylate cyclase-associated protein 1        | rs27551429 | 2.39689E-19 | Hepatic      |
| Tmem234 | 4         | transmembrane protein 234                          | rs32857846 | 6.95986E-18 | Hepatic      |
| Hspa1a  | 17        | heat shock protein 1A                              | rs27547838 | 1.09381E-13 |              |
| Mul1    | 4         | mitochondrial ubiquitin ligase activator of NFKB 1 | rs27566735 | 8.96351E-13 | Hepatic      |
| Yae1d1  | 13        | Yae1 domain containing 1                           | rs27566718 | 9.08787E-12 | Hepatic      |
| Fam167b | 4         | Fam167                                             | rs3704331  | 1.3168E-09  | Hepatic      |
| Syt1l   | 4         | synaptotagmin-like 1                               | rs32381686 | 2.32881E-09 | Non-Hepatic  |
| Hp1bp3  | 4         | heterochromatin protein 1, binding protein 3       | rs27563778 | 3.0088E-09  | Hepatic      |
| Foxj3   | 4         | forkhead box J3                                    | rs27566735 | 4.27993E-09 | Hepatic      |
| Alpl    | 4         | Alpl                                               | rs27522398 | 8.36997E-09 | Hepatic      |
| Ece1    | 4         | endothelin converting enzyme 1                     | rs32989901 | 2.85682E-08 | Hepatic      |
| Ptp4a2  | 4         | protein tyrosine phosphatase 4a2                   | rs27551429 | 4.76135E-08 | Hepatic      |
| Rps6ka1 | 4         | ribosomal protein S6 kinase polypeptide 1          | rs27551429 | 5.17814E-08 | Hepatic      |
| Csnk2a1 | 2         | casein kinase 2, alpha 1 polypeptid                | rs27566718 | 5.27057E-08 | Hepatic      |
| Ppt1    | 4         | palmitoyl-protein thioesterase 1                   | rs27565901 | 7.26142E-08 | Hepatic      |
| Dffa    | 4         | DNA fragmentation factor, alpha subunit            | rs27566622 | 7.51459E-08 | Hepatic      |
| Gstp3   | 19        | glutathione S-transferase pi 3                     | rs27550732 | 9.47912E-08 | Hepatic      |
| Pqlc2   | 4         | PQ loop repeat containing 2                        | rs32979115 | 9.57617E-08 | Hepatic      |
| Tmem82  | 4         | transmembrane protein 82                           | rs27549240 | 1.00507E-07 | Hepatic      |

|               |    |                                                                                                |                |             |             |
|---------------|----|------------------------------------------------------------------------------------------------|----------------|-------------|-------------|
| Wdtdc1        | 4  | WD and tetratricopeptide repeats 1                                                             | rs2756673<br>5 | 1.47796E-07 | Hepatic     |
| Rad51b        | 12 | RAD51 paralog B                                                                                | rs2752659<br>1 | 1.73763E-07 | Hepatic     |
| Adprhl2       | 4  | ADP-ribosylhydrolase like 2                                                                    | rs2754798<br>2 | 1.79333E-07 | Hepatic     |
| Igbp1         | X  | immunoglobulin (CD79A) binding protein 1                                                       | rs2754933<br>1 | 1.87519E-07 | Hepatic     |
| Cgnl1         | 9  | cingulin-like 1                                                                                | rs2752888<br>7 | 2.02079E-07 | Hepatic     |
| Serpina3a     | 12 | serine (or cysteine) peptidase inhibitor, clade A, member 3A                                   | rs2752659<br>1 | 2.03761E-07 | Non-Hepatic |
| Cap2          | 13 | CAP, adenylate cyclase-associated protein, 2                                                   | rs2752659<br>1 | 2.03796E-07 | Non-Hepatic |
| AW209491      | 13 | expressed sequence AW209491                                                                    | rs2753250<br>3 | 2.57316E-07 | Hepatic     |
| Stmn1         | 4  | stathmin 1                                                                                     | rs2752863<br>9 | 2.84614E-07 | Non-Hepatic |
| 1700020D05Rik | 19 | RIKEN cDNA 1700020D05 gene                                                                     | rs2755073<br>2 | 3.02657E-07 |             |
| Alas2         | X  | aminolevulinic acid synthase 2, erythroid                                                      | rs2756463<br>3 | 3.26942E-07 | Hepatic     |
| Eif4g3        | 4  | eukaryotic translation initiation factor 4 gamma, 3                                            | rs3297911<br>5 | 3.33081E-07 | Hepatic     |
| Cml2          | 6  | N-acetyltransferase 8 (GCN5-related) family member 2                                           | rs2752888<br>7 | 3.4159E-07  | Hepatic     |
| Lsm10         | 4  | U7 snRNP-specific Sm-like protein LSM10                                                        | rs2755013<br>1 | 3.4853E-07  | Hepatic     |
| Slc17a2       | 13 | solute carrier family 17 (sodium phosphate), member 2                                          | rs2752659<br>1 | 6.99514E-07 | Hepatic     |
| Pex11a        | 7  | peroxisomal biogenesis factor 11 alpha                                                         | rs2756662<br>2 | 7.74313E-07 | Hepatic     |
| Stim1         | 7  | stromal interaction molecule 1                                                                 | rs2752888<br>7 | 7.77024E-07 | Hepatic     |
| Natd1         | 11 | N-acetyltransferase domain containing 1                                                        | rs2752902<br>5 | 8.53093E-07 | Hepatic     |
| Angel2        | 1  | angel homolog 2                                                                                | rs2752902<br>1 | 8.92921E-07 | Hepatic     |
| Extl1         | 4  | exostoses (multiple)-like 1                                                                    | rs2757833<br>8 | 9.45797E-07 | Hepatic     |
| Nnt           | 13 | nicotinamide nucleotide transhydrogenase                                                       | rs2758100<br>5 | 1.10297E-06 | Hepatic     |
| Tdp2          | 13 | tyrosyl-DNA phosphodiesterase 2                                                                | rs2752659<br>1 | 1.18188E-06 | Hepatic     |
| P4ha1         | 10 | procollagen-proline, 2-oxoglutarate 4-dioxygenase (proline 4-hydroxylase), alpha 1 polypeptide | rs2752659<br>1 | 1.50741E-06 | Hepatic     |
| Smc4          | 3  | structural maintenance of chromosomes 4                                                        | rs2753247<br>1 | 1.60664E-06 | Non-Hepatic |
| Gbas          | 5  | nipsnap homolog 2                                                                              | rs2757860<br>8 | 1.66812E-06 | Hepatic     |

|         |    |                                                                                                   |                |                 |             |
|---------|----|---------------------------------------------------------------------------------------------------|----------------|-----------------|-------------|
| Scnn1g  | 7  | sodium channel, nonvoltage-gated 1 gamma                                                          | rs2756621<br>5 | 1.7595E-06      | Non-Hepatic |
| Pvr     | 7  | poliovirus receptor                                                                               | rs2756662<br>2 | 1.76516E-06     | Hepatic     |
| Chka    | 19 | choline kinase alpha                                                                              | rs2758100<br>5 | 2.40907E-06     | Hepatic     |
| Smox    | 2  | spermine oxidase                                                                                  | rs2753238<br>8 | 2.91947E-06     | Non-Hepatic |
| Cenpc1  | 5  | centromere protein C1                                                                             | rs2752888<br>7 | 3.0287E-06      | Non-Hepatic |
| Mut     | 17 | methylmalonyl-Coenzyme A mutase                                                                   | rs2753266<br>4 | 3.10966E-06     | Hepatic     |
| Mapk7   | 11 | mitogen-activated protein kinase 7                                                                | rs2754974<br>8 | 3.27386E-06     | Hepatic     |
| Mthfd2  | 6  | methylenetetrahydrofolate dehydrogenase (NAD+ dependent), methenyltetrahydrofolate cyclohydrolase | rs2755079<br>3 | 0.00000332<br>9 | Non-Hepatic |
| Ltbp1   | 17 | latent transforming growth factor beta binding protein 1                                          | rs2752642<br>9 | 3.59453E-06     | Non-Hepatic |
| Eif3a   | 19 | eukaryotic translation initiation factor 3, subunit A                                             | rs2755128<br>6 | 3.71956E-06     | Hepatic     |
| Gbbp11  | 4  | GC-rich promoter binding protein 1-like 1                                                         | rs2754941<br>3 | 3.73756E-06     | Hepatic     |
| Exoc7   | 11 | exocyst complex component 7                                                                       | rs2756375<br>3 | 3.87456E-06     | Hepatic     |
| Mthfr   | 4  | methylenetetrahydrofolate reductase                                                               | rs2758100<br>5 | 3.94153E-06     | Hepatic     |
| Tceanc2 | 4  | transcription elongation factor A (SII) N-terminal and central domain containing 2                | rs2755142<br>9 | 4.06448E-06     | Hepatic     |
| Lenep   | 3  | lens epithelial protein                                                                           | rs2752893<br>3 | 4.09754E-06     | Hepatic     |
