# Supplementary material for: Mouse genome-wide association studies and systems genetics uncover the genetic architecture associated with hepatic pharmacokinetic and pharmacodynamic properties of a constrained ethyl antisense oligonucleotide targeting Malat1
Source: PubMed Central journal article supplement (PMC6224167; doi:10.1371/journal.pgen.1007732), 2018-10-29
Supplement: pgen.1007732.s014.pdf [file pgen.1007732.s014.pdf]

**S4 Table****ASO Activity *cis*-eQTL Chromosome 10 rs29210579**

| <b>Gene Symbol</b> | <b>Gene Chr.</b> | <b>Gene Name</b>                                                | <b>rsID</b> | <b>P value</b> | <b>Localization</b> |
|--------------------|------------------|-----------------------------------------------------------------|-------------|----------------|---------------------|
| lah1               | 12               | isoamyl acetate-hydrolyzing esterase 1 homolog                  | rs48369508  | 1.58127E-61    | Hepatic             |
| Adi1               | 12               | acioreductone dioxygenase 1                                     | rs45838918  | 7.31225E-27    | Hepatic             |
| E2f6               | 12               | E2F transcription factor 6                                      | rs3684777   | 6.21236E-24    | Hepatic             |
| Lpin1              | 12               | lipin 1                                                         | rs49484171  | 9.17205E-22    | Hepatic             |
| Trappc12           | 12               | trafficking protein particle complex 12                         | rs29144264  | 2.40415E-21    | Hepatic             |
| Acp1               | 12               | acid phosphatase 1, soluble                                     | rs49260494  | 1.18094E-20    | Hepatic             |
| Rrm2               | 12               | ribonucleotide reductase M2                                     | rs29155982  | 4.0135E-17     | Hepatic             |
| Smc6               | 12               | structural maintenance of chromosomes 6                         | rs29490142  | 2.3226E-11     | Hepatic             |
| Itgb1bp1           | 12               | integrin beta 1 binding protein 1                               | rs47211551  | 3.20623E-11    | Hepatic             |
| Rock2              | 12               | Rho-associated coiled-coil containing protein kinase 2          | rs46223186  | 1.27152E-10    | Hepatic             |
| Cpsf3              | 12               | cleavage and polyadenylation specificity factor 3               | rs29184145  | 2.3677E-10     | Hepatic             |
| Hpcal1             | 12               | hippocalcin-like 1                                              | rs45935031  | 1.14569E-09    | Hepatic             |
| Cys1               | 12               | cystin 1                                                        | rs47354965  | 1.71308E-09    | Non-Hepatic         |
| Zfp277             | 12               | zinc finger protein 277                                         | rs45838918  | 3.29896E-09    | Hepatic             |
| Rdh14              | 12               | retinol dehydrogenase 14                                        | rs48623130  | 2.37663E-08    | Hepatic             |
| Cbl1               | 12               | Casitas B-lineage lymphoma-like 1provided                       | rs51175945  | 3.01035E-08    | Hepatic             |
| Taf1b              | 12               | TATA-box binding protein associated factor, RNA polymerase I, B | rs47487450  | 3.46195E-08    | Hepatic             |
| Pdia6              | 12               | protein disulfide isomerase associated 6                        | rs50683287  | 1.8096E-07     | Hepatic             |
| Adam17             | 12               | a disintegrin and metallopeptidase domain 17                    | rs3684777   | 5.85721E-07    | Hepatic             |
| Sypl               | 12               | synaptophysin-like protein                                      | rs13481321  | 5.99387E-07    | Hepatic             |
| Fos                | 12               | FBJ osteosarcoma oncogene                                       | rs46261446  | 1.74995E-06    | Non-Hepatic         |
| Sntg2              | 12               | syntrophin, gamma 2                                             | rs29169538  | 1.76514E-06    | Hepatic             |

**ASO Activity *trans*-eQTL Chromosome 10 rs29210579**

| Gene Symbol   | Gene Chr. | Gene Name                                                                                         | rsID       | P value     | Localization |
|---------------|-----------|---------------------------------------------------------------------------------------------------|------------|-------------|--------------|
| Nat8f4        | 6         | N-acetyltransferase 8 (GCN5-related) family member 4                                              | rs29488295 | 6.08373E-10 | Hepatic      |
| Sdc4          | 2         | syndecan 4                                                                                        | rs47938088 | 1.8318E-07  | Hepatic      |
| Gdpd3         | 7         | glycerophosphodiester phosphodiesterase domain containing 3                                       | rs45935031 | 2.02673E-07 | Hepatic      |
| Isoc2b        | 7         | isochorismatase domain containing 2b                                                              | rs49480456 | 2.28258E-07 | Hepatic      |
| Prkag1        | 15        | protein kinase, AMP-activated, gamma 1 non-catalytic subunit                                      | rs29223833 | 4.71276E-07 | Hepatic      |
| Lnx1          | 5         | ligand of numb-protein X 1                                                                        | rs48339803 | 5.24089E-07 | Hepatic      |
| BC003331      | 1         | cDNA sequence BC003331                                                                            | rs49366144 | 5.36808E-07 | Hepatic      |
| 1700020D05Rik | 19        | RIKEN cDNA 1700020D05 gene                                                                        | rs46261446 | 9.96558E-07 | unknown      |
| Akr1c12       | 13        | aldo-keto reductase family 1, member C12                                                          | rs46261446 | 1.40275E-06 | Hepatic      |
| Dsg2          | 18        | desmoglein 2                                                                                      | rs33844632 | 1.51741E-06 | Hepatic      |
| Hint2         | 4         | histidine triad nucleotide binding protein 2                                                      | rs47938088 | 1.69072E-06 | Hepatic      |
| Rnf34         | 5         | ring finger protein 34                                                                            | rs47980109 | 1.76689E-06 | Hepatic      |
| Wnt2          | 6         | wingless-type MMTV integration site family, member 2                                              | rs3023949  | 1.79696E-06 | Hepatic      |
| Nnt           | 13        | nicotinamide nucleotide transhydrogenase                                                          | rs13481324 | 1.94054E-06 | Hepatic      |
| Mthfd2        | 6         | methylenetetrahydrofolate dehydrogenase (NAD+ dependent), methenyltetrahydrofolate cyclohydrolase | rs47452109 | 2.02734E-06 | Non-Hepatic  |
| Reep3         | 10        | receptor accessory protein 3                                                                      | rs49744833 | 3.08674E-06 | Hepatic      |
| Aktip         | 8         | thymoma viral proto-oncogene 1 interacting protein                                                | rs29166030 | 3.24034E-06 | Hepatic      |
| Pbld2         | 10        | phenazine biosynthesis-like protein domain containing 2                                           | rs48339803 | 3.64573E-06 | Hepatic      |
| Rpap2         | 5         | RNA polymerase II associated protein 2                                                            | rs29124559 | 3.80246E-06 | Hepatic      |
| Myom2         | 8         | myomesin 2                                                                                        | rs46261446 | 3.84867E-06 | Non-Hepatic  |
| Vamp1         | 6         | vesicle-associated membrane protein 1                                                             | rs47818728 | 4.04978E-06 | Hepatic      |
