# Supplementary material for: Mouse genome-wide association studies and systems genetics uncover the genetic architecture associated with hepatic pharmacokinetic and pharmacodynamic properties of a constrained ethyl antisense oligonucleotide targeting Malat1
Source: PubMed Central journal article supplement (PMC6224167; doi:10.1371/journal.pgen.1007732), 2018-10-29
Supplement: pgen.1007732.s015.pdf [file pgen.1007732.s015.pdf]

S5 Table

ASO Activity *cis*-eQTL Chromosome 10 rs29212236

| Gene Symbol | Gene Chr. | Gene Name                                                       | rsID       | P value     | Localization |
|-------------|-----------|-----------------------------------------------------------------|------------|-------------|--------------|
| Adi1        | 12        | acireductone dioxygenase 1                                      | rs47318213 | 3.40285E-38 | Hepatic      |
| lah1        | 12        | isoamyl acetate-hydrolyzing esterase 1                          | rs48414422 | 6.12146E-31 | Hepatic      |
| Trappc12    | 12        | trafficking protein particle complex 12                         | rs29205864 | 2.32452E-28 | Hepatic      |
| Acp1        | 12        | acid phosphatase 1                                              | rs51659732 | 2.04979E-22 | Hepatic      |
| E2f6        | 12        | E2F transcription factor 6                                      | rs48058564 | 3.35929E-22 | Non-Hepatic  |
| Lpin1       | 12        | lipin 1                                                         | rs29159678 | 1.78584E-20 | Hepatic      |
| Rrm2        | 12        | ribonucleotide reductase M2                                     | rs30768905 | 7.15625E-17 | Hepatic      |
| Zfp277      | 12        | zinc finger protein 277                                         | rs47318213 | 1.05931E-12 | Hepatic      |
| Smc6        | 12        | structural maintenance of chromosomes 6                         | rs29485826 | 2.60259E-12 | Hepatic      |
| Cys1        | 12        | cystin 1                                                        | rs31635405 | 3.2693E-12  | Non-Hepatic  |
| Cpsf3       | 12        | cleavage and polyadenylation specificity factor 3               | rs46095353 | 2.72473E-11 | Hepatic      |
| Rock2       | 12        | Rho-associated coiled-coil containing protein kinase 2          | rs31626421 | 1.41997E-09 | Hepatic      |
| Cbl11       | 12        | Casitas B-lineage lymphoma-like 1 provided                      | rs31635405 | 1.65245E-09 | Hepatic      |
| Sntg2       | 12        | syntrophin, gamma 2                                             | rs29179106 | 1.03864E-08 | Non-Hepatic  |
| Taf1b       | 12        | TATA-box binding protein associated factor, RNA polymerase I, B | rs47075250 | 7.50314E-08 | Hepatic      |
| Sypl        | 12        | synaptophysin-like protein                                      | rs31635405 | 1.30719E-07 | Hepatic      |
| Rdh14       | 12        | retinol dehydrogenase 14                                        | rs52225319 | 3.3898E-07  | Hepatic      |
| Adam17      | 12        | a disintegrin and metallopeptidase domain 17                    | rs29221466 | 6.87891E-07 | Hepatic      |
| Pdia6       | 12        | protein disulfide isomerase associated 6                        | rs29129312 | 7.8158E-07  | Hepatic      |

**ASO Activity *trans*-eQTL Chromosome 10 rs29212236**

| <b>Gene Symbol</b> | <b>Gene Chr.</b> | <b>Gene Name</b>                                                    | <b>rsID</b> | <b>P value</b> | <b>Localization</b> |
|--------------------|------------------|---------------------------------------------------------------------|-------------|----------------|---------------------|
| Nat8f4             | 6                | N-acetyltransferase 8 (GCN5-related) family member 4                | rs49246328  | 3.70932E-11    | Hepatic             |
| Phf20              | 2                | PHD finger protein 20                                               | rs31637355  | 1.62753E-10    | Non-Hepatic         |
| Akr1c12            | 13               | aldo-keto reductase family 1, member C12                            | rs50447450  | 1.64658E-10    | Hepatic             |
| 1700020D05Rik      | 19               | RIKEN cDNA 1700020D05 gene                                          | rs31634792  | 1.19748E-08    |                     |
| Akr1c18            | 13               | aldo-keto reductase family 1, member C18                            | rs51604584  | 1.24107E-08    | Non-Hepatic         |
| Isy1               | 6                | ISY1 splicing factor homolog                                        | rs47798216  | 1.59559E-08    | Hepatic             |
| Isoc2b             | 7                | isochorismatase domain containing 2b                                | rs31633045  | 3.43383E-08    | Hepatic             |
| Plekhb2            | 1                | pleckstrin homology domain containing, family B (evectins) member 2 | rs3671264   | 2.365E-07      | Hepatic             |
| Nnt                | 13               | nicotinamide nucleotide transhydrogenase                            | rs49246328  | 2.76016E-07    | Hepatic             |
| BC003331           | 1                | cDNA sequence BC003331                                              | rs31613420  | 3.18878E-07    | Hepatic             |
| Sh3gl1             | 17               | SH3-domain GRB2-like 1                                              | rs31638728  | 5.51104E-07    | Hepatic             |
| Csrp1              | 1                | cysteine and glycine-rich protein 1                                 | rs47244066  | 9.40926E-07    | Non-Hepatic         |
| Cdc23              | 18               | CDC23 cell division cycle 23                                        | rs29199437  | 1.03093E-06    | Non-Hepatic         |
| Qrs1               | 10               | glutaminyl-tRNA synthase (glutamine-hydrolyzing)-like 1             | rs29207456  | 1.04028E-06    | Hepatic             |
| Wnt2               | 6                | wingless-type MMTV integration site family, member 2                | rs29223304  | 1.40902E-06    | Hepatic             |
| Cttnbp2nl          | 3                | CTTNBP2 N-terminal like                                             | rs29151504  | 2.46168E-06    | Non-Hepatic         |
| Pign               | 1                | phosphatidylinositol glycan anchor biosynthesis, class N            | rs29151504  | 2.47649E-06    | Hepatic             |
| Cdk8               | 5                | cyclin-dependent kinase 8                                           | rs29159678  | 2.59277E-06    | Hepatic             |
| Fggy               | 4                | FGGY carbohydrate kinase domain containing                          | rs29159678  | 2.63189E-06    | Hepatic             |
| Rwdd3              | 3                | RWD domain containing 3                                             | rs29485521  | 2.70038E-06    | Hepatic             |
| Gdi2               | 13               | guanosine diphosphate (GDP) dissociation inhibitor 2                | rs48155658  | 2.81577E-06    | Hepatic             |
| Armcx4             | X                | armadillo repeat containing, X-linked 4                             | rs47798216  | 2.91107E-06    | Non-Hepatic         |
| Anxa5              | 3                | annexin A5                                                          | rs31631407  | 2.99185E-06    | Hepatic             |
| Erb2ip             | 13               | Erb2 interacting protein                                            | rs29151504  | 3.00204E-06    | Hepatic             |

|        |    |                                                           |            |             |             |
|--------|----|-----------------------------------------------------------|------------|-------------|-------------|
| Yae1d1 | 13 | Yae1 domain containing 1                                  | rs49694500 | 3.02897E-06 | Hepatic     |
| Fbxw2  | 2  | F-box and WD-40 domain protein 2                          | rs47034083 | 3.02919E-06 | Hepatic     |
| Vopp1  | 6  | vesicular, overexpressed in cancer, prosurvival protein 1 | rs29160847 | 3.08097E-06 | Non-Hepatic |
| Tipr1  | 1  | TIP41, TOR signalling pathway regulator-like              | rs49264506 | 3.14724E-06 | Hepatic     |
| Ttc3   | 16 | tetratricopeptide repeat domain 3                         | rs48580986 | 3.79857E-06 | Non-Hepatic |
